# Supplementary material
Source: publisher figshare collection journal article supplement (https://aacr.figshare.com/articles/dataset/_/22443828)
Supplement: Supplementary file 1 [file 39894813]

**Supplementary Table 1. Profiling of INCB28060 against 57 human kinases**

| Kinase            | Mean % inhibition of control |
|-------------------|------------------------------|
| ABL               | -2                           |
| AKT1/PKB $\alpha$ | 1                            |
| AKT2/PKB $\beta$  | -3                           |
| AMPK $\alpha$     | 11                           |
| AXL               | 29                           |
| BMX (ETK)         | 7                            |
| BRK               | -6                           |
| BTK               | 1                            |
| CaMK2 $\alpha$    | -2                           |
| CaMK4             | -6                           |
| CDK1              | 2                            |
| CDK2              | 6                            |
| CHK1              | -4                           |
| CHK2              | -1                           |
| CK2               | 3                            |
| c-KIT             | -5                           |
| c-MET             | 101                          |
| CSK               | -3                           |
| EphB2             | -2                           |
| EphB4             | 1                            |
| ERK1              | -1                           |
| ERK2              | 1                            |
| FGFR2             | 1                            |
| FGFR4             | 0                            |
| FLT-1             | -2                           |
| FLT-3             | 12                           |
| FYN               | 0                            |
| ErbB2/HER2        | 8                            |
| IGF1R             | -7                           |
| IRK               | -4                           |
| JAK2              | -9                           |
| JNK2              | 0                            |
| KDR (VEGFR2)      | -27                          |
| LCK               | -2                           |
| LYN               | 7                            |
| MAPKAPK2          | -2                           |
| MEK1/MAP2K1       | -1                           |
| p38 $\alpha$      | -11                          |
| p38 $\delta$      | -3                           |
| P38 $\gamma$      | 7                            |
| PDGFR $\beta$     | -5                           |
| PDK1              | 1                            |

|               |     |
|---------------|-----|
| PKA           | -1  |
| PKC $\alpha$  | 7   |
| PKC $\beta$ 1 | -1  |
| PKC $\beta$ 2 | 9   |
| PKC $\gamma$  | 15  |
| RET           | -3  |
| ROCK1         | 0   |
| ROCK2         | 0   |
| RSK2          | 3   |
| SRC           | -18 |
| SYK           | 1   |
| TIE2          | 0   |
| TRKA          | 1   |
| TRKB          | 14  |
| YES           | -2  |

The kinase profiling was conducted by CEREP according to the manufacturer's specifications.
